# Supplementary material for: Synthesis, characterization, and density functional theory investigation of (CH6N3)2[NpO2Cl3] and Rb[NpO2Cl2(H2O)] chain structures
Source: Royal Society of Chemistry journal article supplement (doi:10.1039/d3dt03630h), 2024-01-01
Supplement: d3dt03630h1.pdf [file d3dt03630h1.pdf]

# Synthesis, characterization, and Density Functional Theory investigation of (CH<sub>6</sub>N<sub>3</sub>)<sub>2</sub>[NpO<sub>2</sub>Cl<sub>3</sub>] and Rb[NpO<sub>2</sub>Cl<sub>2</sub>(H<sub>2</sub>O)] chain structures

Harindu Rajapaksha<sup>a</sup>, Grant C. Benthin<sup>a</sup>, Emma L. Markun<sup>a</sup>, Sara E. Mason<sup>\*a,b</sup>, Tori Z.  
Forbes<sup>\*a</sup>

<sup>a</sup> Department of Chemistry, University of Iowa, Iowa City, IA 52242, USA

<sup>b</sup> Center for Functional Nanomaterials, Brookhaven National Laboratory, Upton, NY 11973,  
USA

\*Corresponding Authors: Tori Z. Forbes Email: [tori-forbes@uiowa.edu](mailto:tori-forbes@uiowa.edu), Sara E. Mason Email:  
[smason@bnl.gov](mailto:smason@bnl.gov)

## Supporting Information

### Table of Contents

|                                                                                              |   |
|----------------------------------------------------------------------------------------------|---|
| 1. Preparation of Np(v) stock.....                                                           | 4 |
| 2. Crystallography.....                                                                      | 5 |
| 2.1 Thermal ellipsoid plots generated through CheckCIF.....                                  | 5 |
| <b>Figure S1:</b> The Thermal ellipsoid plot of Np-Gua generated through CheckCIF. ....      | 5 |
| <b>Figure S2:</b> The Thermal ellipsoid plot of Np-Rb generated through CheckCIF. ....       | 5 |
| 2.2 Crystallographic bond lengths.....                                                       | 6 |
| <b>Table S1:</b> Selected crystallographic bond lengths of Np-Gua. ....                      | 6 |
| <b>Table S2:</b> Selected crystallographic bond lengths of Np-Rb.....                        | 6 |
| 2.3 Crystallographic bond angles.....                                                        | 6 |
| <b>Table S3:</b> Selected crystallographic bond angles of Np-Gua.....                        | 6 |
| <b>Table S4:</b> Selected crystallographic bond angles of Np-Rb.....                         | 7 |
| 3. Computational details.....                                                                | 8 |
| 3.1 Periodic Density Functional Theory calculations.....                                     | 8 |
| 3.1.1 Periodic Density Functional Theory calculations details.....                           | 8 |
| <b>Table S1:</b> K-grid used in periodic DFT calculations.....                               | 8 |
| <b>Table S5:</b> Comparison of experimental and calculated lattice parameters of Np-Gua..... | 8 |
| <b>Table S6:</b> Comparison of experimental and calculated lattice parameters of Np-Rb.....  | 8 |
| 3.1.2 Periodic Density Functional Theory calculated bond lengths. ....                       | 8 |
| <b>Table S7:</b> The periodic DFT calculated bond lengths of Np-Gua and Np-Rb.....           | 8 |
| Np-Gua.....                                                                                  | 8 |

|       |                                                                                                                          |    |
|-------|--------------------------------------------------------------------------------------------------------------------------|----|
| 3.1.3 | Bond Order (BO) calculation.....                                                                                         | 9  |
|       | <b>Table S8:</b> The periodic DFT calculated bond order of neptunyl units of Np-Gua, Np-Rb and Np-Cs.9                   |    |
|       | Np-Gua.....                                                                                                              | 9  |
| 3.2   | Molecular Density Functional Theory calculations.....                                                                    | 9  |
| 3.2.1 | XYZ coordinates of optimized molecular DFT optimized structures in aqueous media .....                                   | 9  |
|       | <b>Table S9:</b> The xyz coordinates of optimized $[\text{NpO}_2\text{Cl}_2(\text{H}_2\text{O})_2]^-$ .....              | 9  |
|       | <b>Table S10:</b> The xyz coordinates of optimized $[\text{NpO}_2\text{Cl}_2(\text{H}_2\text{O})_3]^-$ .....             | 10 |
|       | <b>Table S11:</b> The xyz coordinates of optimized $[\text{NpO}_2\text{Cl}_3(\text{H}_2\text{O})]^{2-}$ .....            | 10 |
|       | <b>Table S12:</b> The xyz coordinates of optimized $[\text{NpO}_2\text{Cl}_3(\text{H}_2\text{O})_2]^{2-}$ .....          | 10 |
|       | <b>Table S13:</b> The xyz coordinates of optimized $[\text{NpO}_2\text{Cl}_4]^{3-}$ .....                                | 10 |
|       | <b>Table S14:</b> The xyz coordinates of optimized $[\text{NpO}_2\text{Cl}_4(\text{H}_2\text{O})]^{3-}$ .....            | 11 |
|       | <b>Table S15:</b> The xyz coordinates of optimized $[(\text{NpO}_2)_2\text{Cl}_7]^{-5}$ .....                            | 11 |
|       | <b>Table S16:</b> The xyz coordinates of optimized $[(\text{NpO}_2)_2\text{Cl}_8]^{-6}$ .....                            | 11 |
|       | <b>Table S17:</b> The xyz coordinates of optimized $[(\text{NpO}_2)_2\text{Cl}_6(\text{H}_2\text{O})_2]^{4-}$ .....      | 12 |
|       | <b>Table S18:</b> The xyz coordinates of optimized $[(\text{NpO}_2)_3\text{Cl}_8(\text{H}_2\text{O})_3]^{5-}$ .....      | 12 |
|       | <b>Table S19:</b> The xyz coordinates of optimized $[(\text{NpO}_2)_3\text{Cl}_{10}]^{7-}$ .....                         | 13 |
| 3.2.2 | Selected bond lengths of molecular DFT optimized structures in aqueous media .....                                       | 13 |
|       | <b>Table S20:</b> Selected bond lengths of molecular DFT optimized monomeric structures in aqueous media.....            | 13 |
|       | $[\text{NpO}_2\text{Cl}_3(\text{H}_2\text{O})]^{2-}$ .....                                                               | 13 |
|       | $[\text{NpO}_2\text{Cl}_3(\text{H}_2\text{O})_2]^{2-}$ .....                                                             | 13 |
|       | $[\text{NpO}_2\text{Cl}_4]^{3-}$ .....                                                                                   | 13 |
|       | $[\text{NpO}_2\text{Cl}_4(\text{H}_2\text{O})]^{3-}$ .....                                                               | 13 |
|       | <b>Table S21:</b> Selected bond lengths of molecular DFT optimized dimeric and trimeric structures in aqueous media..... | 13 |
|       | $[(\text{NpO}_2)_2\text{Cl}_7]^{-5}$ .....                                                                               | 13 |
|       | $[(\text{NpO}_2)_2\text{Cl}_6(\text{H}_2\text{O})_2]^{4-}$ .....                                                         | 14 |
|       | $[(\text{NpO}_2)_3\text{Cl}_{10}]^{7-}$ .....                                                                            | 14 |
|       | $[(\text{NpO}_2)_3\text{Cl}_8(\text{H}_2\text{O})_3]^{5-}$ .....                                                         | 14 |
| 4.    | Non-covalent interactions analysis .....                                                                                 | 14 |
|       | <b>Table S22:</b> The full list of hydrogen bonding interactions in the unit cell of Np-Gua .....                        | 14 |
|       | <b>Table S23:</b> The full list of cation interactions in the unit cell of Np-Rb.....                                    | 15 |
|       | <b>Table S24:</b> The full list of hydrogen bonding interactions in the unit cell of Np-Rb .....                         | 15 |
| 5.    | Vibrational analysis .....                                                                                               | 16 |
| 4.1   | Fitted Raman spectra.....                                                                                                | 16 |

|                                                                                                                                                                                                         |    |
|---------------------------------------------------------------------------------------------------------------------------------------------------------------------------------------------------------|----|
| <b>Figure S3:</b> Fitted Raman spectrum of Np-Gua in the spectral window of 1100-600 $\text{cm}^{-1}$ with fitting parameters. ....                                                                     | 16 |
| <b>Figure S4:</b> Fitted Raman spectrum of Np-Rb in the spectral window of 1100-600 $\text{cm}^{-1}$ with fitting parameters. ....                                                                      | 17 |
| 4.2 Calculated vibrational modes.....                                                                                                                                                                   | 18 |
| <b>Table S25:</b> The calculated vibrational modes of $[(\text{NpO}_2)_2\text{Cl}_8]^{6-}$ . Red font is used to identify the neptunyl symmetric and asymmetrical stretches. ....                       | 18 |
| <b>Table S26:</b> The calculated vibrational modes of $[(\text{NpO}_2)_2\text{Cl}_6(\text{H}_2\text{O})_2]^{4-}$ . Red font is used to identify the neptunyl symmetric and asymmetrical stretches. .... | 18 |
| <b>Table S27:</b> The calculated vibrational modes of Guanidinium cation.....                                                                                                                           | 19 |
| 6. Insight into chain formation.....                                                                                                                                                                    | 20 |
| <b>Table S28:</b> Possible formation reactions that may be involved in the formation of <b>Np-Gua</b> . ....                                                                                            | 20 |
| <b>Table S29:</b> Possible formation reactions that may be involved in the formation of Np-Rb. ....                                                                                                     | 21 |
| 7. References.....                                                                                                                                                                                      | 22 |

## 1. Preparation of Np(v) stock

Approximately 300 mg of  $^{237}\text{Np}$  was reprocessed from precipitates from previous experiments. These Np precipitates were dissolved in 50 mL of 4.0 M  $\text{HNO}_3$  solution and ozonation was performed for 45 min at 1 L/min flow rate resulting in a yellow Np(VI) solution.  $^{237}\text{Np}$  from the resulting solution was extracted with 15 mL aliquots of 30% TBP in dodecane.  $^{237}\text{Np}$  in organic layer was back extracted to 0.1 M HCl solution by slow addition  $\text{NaNO}_2$  until the organic layer turns colorless. Purified  $^{237}\text{Np}$  was precipitated with a minimal amount of sat. NaOH resulting in a light gray precipitate. The precipitate was separated by centrifuging at 5000 rpm for 5 minutes. The supernatant was removed and the precipitate was washed with distilled water three times. To make the stock solution, the final purified precipitate was dissolved in a minimum amount of 2 M HCl solution. The  $^{237}\text{Np}$  concentration was determined to be 0.27 M with liquid scintillation counting.

## 2. Crystallography

### 2.1 Thermal ellipsoid plots generated through CheckCIF

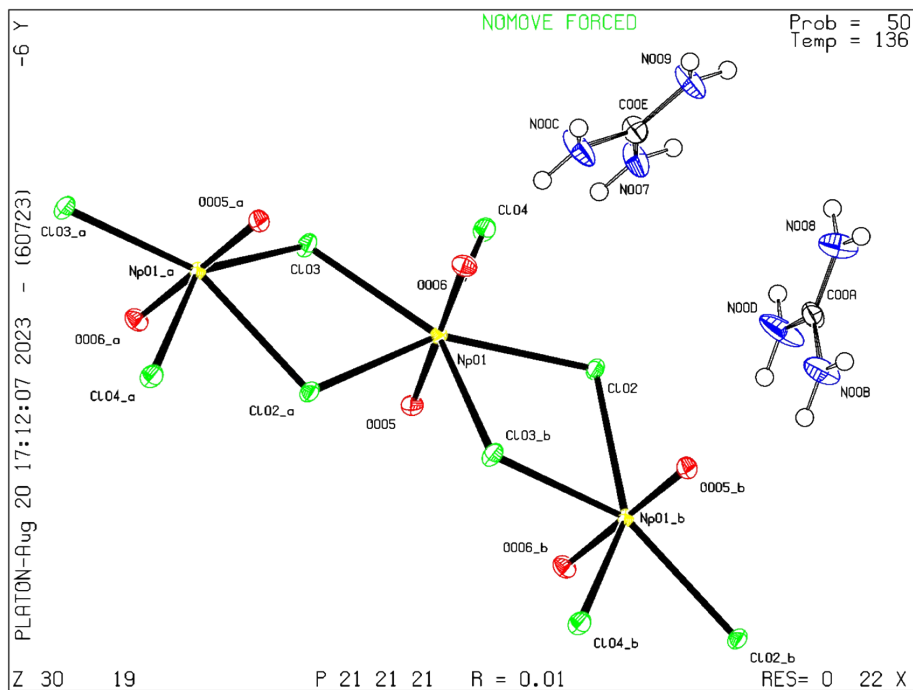

Figure S1: The Thermal ellipsoid plot of Np-Gua generated through CheckCIF.

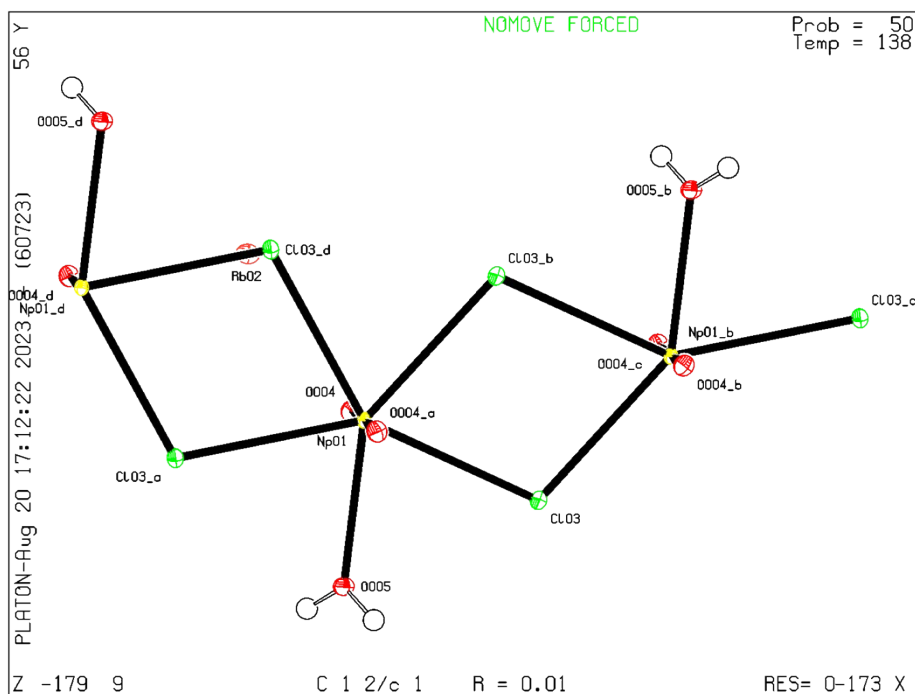

**Figure S2:** The Thermal ellipsoid plot of Np-Rb generated through CheckCIF.

## 2.2 Crystallographic bond lengths

**Table S1:** Selected crystallographic bond lengths of Np-Gua.

| Atoms                  | Bond Lengths (Å) |
|------------------------|------------------|
| Np01 Cl02 <sup>1</sup> | 2.8693(7)        |
| Np01 Cl02              | 2.8577(6)        |
| Np01 Cl03              | 2.8477(7)        |
| Np01 Cl03 <sup>2</sup> | 2.8568(7)        |
| Np01 Cl04              | 2.8355(7)        |
| Np01 O005              | 1.823(2)         |
| Np01 O006              | 1.8128(19)       |

<sup>1</sup>-1/2+X,1/2-Y,1-Z; <sup>2</sup>1/2+X,1/2-Y,1-Z

**Table S2:** Selected crystallographic bond lengths of Np-Rb

| Atoms                  | Bond Lengths (Å) |
|------------------------|------------------|
| Np01 Cl03 <sup>4</sup> | 2.8231(5)        |
| Np01 Cl03 <sup>5</sup> | 2.8587(5)        |
| Np01 Cl03 <sup>6</sup> | 2.8587(5)        |
| Np01 Cl03              | 2.8232(5)        |
| Np01 O004 <sup>4</sup> | 1.8265(15)       |
| Np01 O004              | 1.8265(15)       |
| Np01 O005              | 2.452(2)         |

<sup>4</sup>1-X,+Y,1/2-Z; <sup>5</sup>1/2-X,3/2-Y,-Z; <sup>6</sup>1/2+X,3/2-Y,1/2+Z

## 2.3 Crystallographic bond angles

**Table S3:** Selected crystallographic bond angles of Np-Gua.

| Atoms                                    | Bond angle (°) |
|------------------------------------------|----------------|
| Cl02 Np01 Cl02 <sup>1</sup>              | 142.620(15)    |
| Cl03 Np01 Cl02                           | 145.14(2)      |
| Cl03 <sup>2</sup> Np01 Cl02 <sup>1</sup> | 71.93(2)       |
| Cl03 <sup>2</sup> Np01 Cl02              | 71.55(2)       |
| Cl03 Np01 Cl02 <sup>1</sup>              | 71.51(2)       |
| Cl03 Np01 Cl03 <sup>2</sup>              | 143.269(17)    |
| Cl04 Np01 Cl02                           | 72.53(2)       |
| Cl04 Np01 Cl02 <sup>1</sup>              | 144.18(2)      |
| Cl04 Np01 Cl03 <sup>2</sup>              | 143.86(2)      |
| Cl04 Np01 Cl03                           | 72.81(2)       |
| O005 Np01 Cl02 <sup>1</sup>              | 86.80(7)       |
| O005 Np01 Cl02                           | 86.46(7)       |
| O005 Np01 Cl03                           | 89.92(7)       |
| O005 Np01 Cl03 <sup>2</sup>              | 91.51(7)       |

|                             |            |
|-----------------------------|------------|
| O005 Np01 Cl04              | 90.13(7)   |
| O006 Np01 Cl02              | 93.93(8)   |
| O006 Np01 Cl02 <sup>1</sup> | 92.86(7)   |
| O006 Np01 Cl03 <sup>2</sup> | 88.57(7)   |
| O006 Np01 Cl03              | 89.79(8)   |
| O006 Np01 Cl04              | 90.04(6)   |
| O006 Np01 O005              | 179.61(11) |
| Np01 Cl02 Np01 <sup>2</sup> | 105.36(2)  |
| Np01 Cl03 Np01 <sup>1</sup> | 105.96(2)  |

<sup>1</sup>-1/2+X,1/2-Y,1-Z; <sup>2</sup>1/2+X,1/2-Y,1-Z

---

**Table S4:** Selected crystallographic bond angles of Np-Rb.

| Atoms                                    | Bond angle (°) |
|------------------------------------------|----------------|
| Cl03 Np01 Cl03 <sup>4</sup>              | 72.288(17)     |
| Cl03 <sup>5</sup> Np01 Cl03 <sup>6</sup> | 72.289(17)     |
| Cl03 Np01 Cl03 <sup>6</sup>              | 143.628(12)    |
| Cl03 <sup>6</sup> Np01 Cl03 <sup>4</sup> | 71.35(2)       |
| Cl03 <sup>5</sup> Np01 Cl03 <sup>4</sup> | 143.629(12)    |
| Cl03 <sup>5</sup> Np01 Cl03              | 144.08(2)      |
| O004 <sup>5</sup> Np01 Cl03 <sup>6</sup> | 91.40(5)       |
| O004 Np01 Cl03                           | 90.79(5)       |
| O004 <sup>5</sup> Np01 Cl03 <sup>4</sup> | 89.32(5)       |
| O004 Np01 Cl03 <sup>5</sup>              | 88.94(5)       |
| O004 Np01 Cl03 <sup>4</sup>              | 91.41(5)       |
| O004 <sup>5</sup> Np01 Cl03 <sup>5</sup> | 90.79(5)       |
| O004 Np01 Cl03 <sup>6</sup>              | 89.32(5)       |
| O004 <sup>5</sup> Np01 Cl03              | 88.94(5)       |
| O004 Np01 O004 <sup>5</sup>              | 179.10(9)      |
| O004 <sup>5</sup> Np01 O005              | 89.55(5)       |
| O004 Np01 O005                           | 89.55(5)       |
| O005 Np01 Cl03 <sup>6</sup>              | 144.326(10)    |
| O005 Np01 Cl03                           | 72.041(11)     |
| O005 Np01 Cl03 <sup>5</sup>              | 72.040(11)     |
| O005 Np01 Cl03 <sup>4</sup>              | 144.326(10)    |
| Np01 Cl03 Np01 <sup>4</sup>              | 107.713(17)    |

<sup>4</sup>1/2-X,3/2-Y,-Z; <sup>5</sup>1-X,+Y,1/2-Z; <sup>6</sup>1/2+X,3/2-Y,1/2+Z

---

### 3. Computational details

#### 3.1 Periodic Density Functional Theory calculations

##### 3.1.1 Periodic Density Functional Theory calculations details

**Table S1:** K-grid used in periodic DFT calculations

| Compound | K grid |
|----------|--------|
| Np-Gua   | 5x4x3  |
| Np-Rb    | 5x4x6  |

**Table S5:** Comparison of experimental and calculated lattice parameters of Np-Gua

|                      | a (Å)     | b (Å)     | c (Å)      | $\alpha$ (°) | $\beta$ (°) | $\gamma$ (°) |
|----------------------|-----------|-----------|------------|--------------|-------------|--------------|
| <b>Experimental</b>  | 8.6197(3) | 9.7216(4) | 14.5517(6) | 90           | 90          | 90           |
| <b>Theoretical</b>   | 8.7103    | 9.8516    | 14.2635    | 90           | 90          | 90           |
| <b>Percent Error</b> | 1.05 %    | 1.34 %    | -1.98 %    | 0 %          | 0 %         | 0 %          |

**Table S6:** Comparison of experimental and calculated lattice parameters of Np-Rb

|                      | a (Å)     | b (Å)      | c (Å)     | $\alpha$ (°) | $\beta$ (°) | $\gamma$ (°) |
|----------------------|-----------|------------|-----------|--------------|-------------|--------------|
| <b>Experimental</b>  | 8.4988(4) | 11.3956(5) | 7.4459(6) | 90           | 114.205(1)  | 90           |
| <b>Theoretical</b>   | 8.5810    | 11.4890    | 7.5237    | 90           | 115.011     | 90           |
| <b>Percent Error</b> | 0.97 %    | 0.82 %     | -1.04 %   | 0 %          | 0.71 %      | 0 %          |

##### 3.1.2 Periodic Density Functional Theory calculated bond lengths.

**Table S7:** The periodic DFT calculated bond lengths of Np-Gua and Np-Rb

| Structure | Average Np=O bond length (Å) | Average terminal Np-Cl bond length (Å) | Average bridging Np-Cl bond length (Å) | Average Np-OH <sub>2</sub> bond length (Å) |
|-----------|------------------------------|----------------------------------------|----------------------------------------|--------------------------------------------|
| Np-Gua    | 1.832                        | 2.864                                  | 2.884                                  | -                                          |
| Np-Rb     | 1.826                        | -                                      | 2.841                                  | 2.322                                      |



### 3.1.3 Bond Order (BO) calculation

The bond order between A and j atoms ( $B_{A,j}$ ) is defined as following equation.<sup>1-4</sup>

$$B_{A,j} = 2 \oint \oint \frac{\rho_A^{\rightarrow avg}(r_A) \cdot \rho_j^{\rightarrow avg}(r'_j)}{\rho^{\rightarrow avg}(\vec{r}) \cdot \rho^{\rightarrow avg}(\vec{r})} \rho(\vec{r}) \rho^{DX_{hole}}(\vec{r}, \vec{r}') d^3\vec{r}' d^3\vec{r} \quad \text{SI Eq 1}$$

$\rho^{\rightarrow avg}(\vec{r})$  = spherically average electron density at r

$\rho_A^{\rightarrow avg}(r_A)$  = spherically average electron density of atom A at  $r_A$  distance from A,

$\rho(\vec{r})$  = electron density at r

$\rho^{DX_{hole}}(\vec{r}, \vec{r}')$  = the dressed exchange holes

The above equation describing the bond order is taken from previous work by Manz *et al.*<sup>1-4</sup> For more details on the bond order determination we encourage readers to refer to the cited works.

**Table S8:** The periodic DFT calculated bond order of neptunyl units of Np-Gua, Np-Rb and Np-Cs.

| Structure | Average Np=O bond BO | Average terminal Np-Cl bond BO | Average bridging Np-Cl bond BO | Average Np-OH <sub>2</sub> bond BO |
|-----------|----------------------|--------------------------------|--------------------------------|------------------------------------|
| Np-Gua    | 1.425                | 0.285                          | 0.295                          | -                                  |
| Np-Rb     | 1.47                 | -                              | 0.295                          | 0.30                               |
| Np-Cs     | 1.53                 | 0.40                           | -                              | -                                  |

## 3.2 Molecular Density Functional Theory calculations

### 3.2.1 XYZ coordinates of optimized molecular DFT optimized structures in aqueous media

**Table S9:** The xyz coordinates of optimized [NpO<sub>2</sub>Cl<sub>2</sub>(H<sub>2</sub>O)<sub>2</sub>]<sup>-</sup>

|    |          |          |          |
|----|----------|----------|----------|
| O  | 28.47500 | 21.53470 | 2.11970  |
| O  | 28.47830 | 21.53480 | -1.48260 |
| O  | 28.27250 | 18.91710 | 0.21660  |
| H  | 27.29790 | 18.93700 | 0.18420  |
| O  | 31.09270 | 21.74500 | 0.41710  |
| H  | 31.06910 | 22.71980 | 0.44460  |
| Cl | 25.72680 | 20.70060 | 0.30660  |
| Cl | 29.30700 | 24.28650 | 0.32710  |

|    |          |          |          |
|----|----------|----------|----------|
| H  | 28.55850 | 18.52960 | -0.62010 |
| H  | 31.48260 | 21.46500 | 1.25480  |
| Np | 28.45140 | 21.56000 | 0.31850  |

**Table S10:** The xyz coordinates of optimized  $[\text{NpO}_2\text{Cl}_2(\text{H}_2\text{O})_3]^-$

|    |          |          |          |
|----|----------|----------|----------|
| Np | -5.35950 | -0.96440 | 0.10060  |
| O  | -5.42440 | 0.83500  | -0.05630 |
| O  | -7.99750 | -0.97800 | 0.06070  |
| O  | -5.33270 | -2.75030 | 0.36850  |
| O  | -6.53050 | -0.79390 | 2.43380  |
| H  | -7.07350 | -0.00870 | 2.57470  |
| H  | -5.90310 | -0.82490 | 3.16710  |
| H  | -8.39520 | -1.72530 | 0.52400  |
| H  | -8.04540 | -1.18200 | -0.89280 |
| O  | -3.68180 | -0.64030 | 2.15320  |
| H  | -2.91430 | -0.77690 | 1.56210  |
| H  | -3.61790 | 0.27800  | 2.44520  |
| Cl | -2.56540 | -1.03800 | -0.64490 |
| Cl | -6.49030 | -1.32060 | -2.54230 |

**Table S11:** The xyz coordinates of optimized  $[\text{NpO}_2\text{Cl}_3(\text{H}_2\text{O})]^{2-}$

|    |          |          |          |
|----|----------|----------|----------|
| O  | 28.42450 | 21.28730 | 2.12560  |
| O  | 28.38650 | 21.53250 | -1.48550 |
| O  | 31.00380 | 21.74300 | 0.30370  |
| H  | 30.89530 | 22.70860 | 0.41760  |
| Cl | 25.57820 | 21.77870 | 0.36150  |
| Cl | 29.21030 | 24.19630 | 0.49480  |
| H  | 31.45330 | 21.42750 | 1.09730  |
| Np | 28.36550 | 21.40430 | 0.31940  |
| Cl | 28.09260 | 18.58750 | 0.12250  |

**Table S12:** The xyz coordinates of optimized  $[\text{NpO}_2\text{Cl}_3(\text{H}_2\text{O})_2]^{2-}$

|    |          |          |          |
|----|----------|----------|----------|
| Np | -5.33490 | -0.89990 | 0.22010  |
| O  | -5.59400 | 0.88800  | 0.15020  |
| O  | -7.92440 | -1.31900 | -0.28600 |
| O  | -5.14410 | -2.69650 | 0.22520  |
| O  | -6.02270 | -1.01790 | -2.35150 |
| H  | -6.36340 | -1.88850 | -2.58980 |
| H  | -5.08720 | -0.99380 | -2.63820 |
| H  | -8.33620 | -0.56470 | -0.72460 |
| H  | -8.15060 | -1.24770 | 0.66380  |
| Cl | -3.11840 | -0.66160 | -1.71580 |
| Cl | -7.08920 | -1.09520 | 2.58050  |
| Cl | -3.29270 | -0.62490 | 2.17350  |

**Table S13:** The xyz coordinates of optimized  $[\text{NpO}_2\text{Cl}_4]^{3-}$ 

|    |          |          |          |
|----|----------|----------|----------|
| O  | 28.37580 | 21.59410 | 2.12310  |
| O  | 28.38420 | 21.66000 | -1.48930 |
| Cl | 25.53520 | 21.64650 | 0.30950  |
| Cl | 28.39690 | 24.47080 | 0.37360  |
| Cl | 31.22490 | 21.60770 | 0.32440  |
| Cl | 28.36310 | 18.78340 | 0.26030  |
| Np | 28.38000 | 21.62710 | 0.31690  |

**Table S14:** The xyz coordinates of optimized  $[\text{NpO}_2\text{Cl}_4(\text{H}_2\text{O})]^{3-}$ 

|    |          |          |          |
|----|----------|----------|----------|
| Np | -5.35950 | -0.83120 | 0.26340  |
| O  | -5.55110 | 0.95810  | 0.14000  |
| O  | -5.17230 | -2.62200 | 0.34740  |
| O  | -5.87330 | -0.84180 | -2.37020 |
| H  | -6.63840 | -1.43990 | -2.34810 |
| H  | -5.08100 | -1.31590 | -2.66660 |
| Cl | -3.00720 | -0.89290 | -1.59120 |
| Cl | -6.79800 | -0.81070 | 2.74960  |
| Cl | -3.17280 | -0.47070 | 2.09390  |
| Cl | -8.19510 | -1.42040 | -0.62970 |

**Table S15:** The xyz coordinates of optimized  $[(\text{NpO}_2)_2\text{Cl}_7]^{-5}$ 

|    |          |          |          |
|----|----------|----------|----------|
| Cl | 8.02760  | 34.71010 | 14.29170 |
| Cl | 4.57140  | 34.96040 | 13.66460 |
| Np | 6.13610  | 37.15900 | 14.80410 |
| Cl | 3.41160  | 38.19570 | 14.63630 |
| Cl | 6.30300  | 39.85600 | 15.92670 |
| O  | 5.81990  | 36.51350 | 16.46240 |
| O  | 6.50260  | 37.78530 | 13.14740 |
| Np | 10.67500 | 35.83380 | 14.31300 |
| Cl | 12.10260 | 33.73980 | 12.99900 |
| O  | 10.35950 | 36.61910 | 12.71170 |
| O  | 10.98050 | 35.04440 | 15.91460 |
| Cl | 13.03230 | 37.41670 | 14.60100 |
| Cl | 9.04920  | 37.76350 | 15.64680 |

**Table S16:** The xyz coordinates of optimized  $[(\text{NpO}_2)_2\text{Cl}_8]^{-6}$ 

|    |          |          |          |
|----|----------|----------|----------|
| Cl | 7.91770  | 34.79130 | 14.56450 |
| Cl | 4.48840  | 34.88220 | 13.77630 |
| Np | 6.05810  | 37.14660 | 14.80740 |
| Cl | 3.30150  | 38.16730 | 14.57300 |
| Cl | 6.20290  | 39.97000 | 15.63620 |
| O  | 5.69820  | 36.64730 | 16.50420 |
| O  | 6.42840  | 37.64200 | 13.11170 |
| Np | 10.72680 | 35.79020 | 14.24390 |
| Cl | 13.44880 | 35.23530 | 13.24390 |
| Cl | 10.63020 | 33.05510 | 13.20340 |

|    |          |          |          |
|----|----------|----------|----------|
| O  | 10.27460 | 36.44710 | 12.62500 |
| O  | 11.17050 | 35.13230 | 15.86600 |
| Cl | 12.24870 | 38.24180 | 14.80750 |
| Cl | 8.87980  | 37.73320 | 15.5867  |

**Table S17:** The xyz coordinates of optimized  $[(\text{NpO}_2)_2\text{Cl}_6(\text{H}_2\text{O})_2]^{4-}$

|    |          |          |         |
|----|----------|----------|---------|
| Cl | 6.13670  | 29.69110 | 1.17270 |
| H  | 7.11630  | 34.67270 | 1.43960 |
| Cl | 5.73490  | 33.36880 | 0.35110 |
| O  | 6.55070  | 32.16230 | 3.47310 |
| Cl | 8.95510  | 29.69950 | 3.55550 |
| O  | 8.84870  | 31.70780 | 0.72190 |
| H  | 7.94310  | 34.96920 | 2.74390 |
| Np | 7.69290  | 31.90870 | 2.09730 |
| O  | 7.98210  | 34.54860 | 1.87680 |
| O  | 11.20650 | 30.71570 | 6.05660 |
| H  | 12.48220 | 27.98280 | 4.23270 |
| Cl | 14.18230 | 29.27080 | 4.80590 |
| O  | 12.05610 | 30.75040 | 2.54380 |
| H  | 11.15780 | 27.80590 | 3.40220 |
| Cl | 9.82110  | 33.00930 | 3.84690 |
| Cl | 13.39540 | 32.96100 | 4.75410 |
| Np | 11.63750 | 30.75830 | 4.30050 |
| O  | 11.51220 | 28.09950 | 4.24990 |

**Table S18:** The xyz coordinates of optimized  $[(\text{NpO}_2)_3\text{Cl}_8(\text{H}_2\text{O})_3]^{5-}$

|    |          |          |         |
|----|----------|----------|---------|
| Cl | 6.20970  | 29.66540 | 0.85680 |
| H  | 6.68220  | 34.63400 | 1.85000 |
| Cl | 5.22300  | 33.29000 | 0.92070 |
| O  | 7.01140  | 31.75090 | 3.41490 |
| Cl | 9.59200  | 29.70740 | 2.34740 |
| O  | 8.44130  | 32.12650 | 0.12050 |
| H  | 7.81250  | 34.83890 | 2.92010 |
| Np | 7.71800  | 31.91410 | 1.76300 |
| O  | 7.64370  | 34.55350 | 2.01490 |
| O  | 10.50010 | 30.71140 | 5.48240 |
| H  | 12.04590 | 27.91930 | 4.84220 |
| Cl | 13.70010 | 29.64430 | 5.86610 |
| O  | 12.82020 | 30.94550 | 2.72940 |
| H  | 10.83100 | 27.90800 | 3.86810 |
| Cl | 10.15810 | 33.08970 | 3.03900 |
| H  | 15.24250 | 34.83930 | 5.39050 |
| Cl | 12.95940 | 33.02530 | 5.49180 |
| O  | 15.13050 | 31.93740 | 8.05500 |
| Np | 11.65620 | 30.85270 | 4.10680 |
| O  | 11.73820 | 28.22030 | 3.97740 |
| Cl | 17.29430 | 29.63850 | 6.81350 |
| O  | 16.04650 | 31.84860 | 4.56430 |

|    |          |          |         |
|----|----------|----------|---------|
| H  | 16.53030 | 34.60500 | 6.27350 |
| Np | 15.59900 | 31.86980 | 6.31050 |
| O  | 15.55640 | 34.52700 | 6.24740 |
| Cl | 18.17070 | 33.28580 | 6.82910 |

**Table S19:** The xyz coordinates of optimized  $[(\text{NpO}_2)_3\text{Cl}_{10}]^{7-}$

|    |          |          |          |
|----|----------|----------|----------|
| Cl | 7.91710  | 34.78050 | 14.49410 |
| Cl | 4.42210  | 34.86300 | 13.99050 |
| Np | 6.03240  | 37.14740 | 14.82180 |
| Cl | 3.28420  | 38.17640 | 14.55470 |
| Cl | 6.22120  | 39.99500 | 15.57840 |
| O  | 5.74050  | 36.70660 | 16.55100 |
| O  | 6.34290  | 37.56930 | 13.09280 |
| Np | 10.66110 | 35.75210 | 14.23010 |
| Cl | 17.44350 | 35.81320 | 14.59240 |
| Cl | 13.53770 | 35.29780 | 13.37760 |
| Cl | 10.72820 | 33.11400 | 13.03220 |
| O  | 10.30170 | 36.45440 | 12.60390 |
| O  | 11.04890 | 35.05460 | 15.85250 |
| Np | 15.00300 | 37.26590 | 14.91040 |
| Cl | 12.31320 | 38.19720 | 14.89940 |
| Cl | 8.92330  | 37.77330 | 15.47080 |
| Cl | 16.06250 | 39.41040 | 16.44990 |
| O  | 14.68360 | 36.34760 | 16.43560 |
| O  | 15.32380 | 38.17800 | 13.38210 |

### 3.2.2 Selected bond lengths of molecular DFT optimized structures in aqueous media

**Table S20:** Selected bond lengths of molecular DFT optimized monomeric structures in aqueous media

| Structure                                            | Average Np=O bond length (Å) | Average Np-Cl bond length (Å) | Average Np-OH <sub>2</sub> bond length (Å) |
|------------------------------------------------------|------------------------------|-------------------------------|--------------------------------------------|
| $[\text{NpO}_2\text{Cl}_2(\text{H}_2\text{O})_2]^-$  | 1.801                        | 2.858                         | 2.651                                      |
| $[\text{NpO}_2\text{Cl}_2(\text{H}_2\text{O})_3]^-$  | 1.807                        | 2.895                         | 2.642                                      |
| $[\text{NpO}_2\text{Cl}_3(\text{H}_2\text{O})]^{2-}$ | 1.811                        | 2.857                         | 2.660                                      |
| $[\text{NpO}_2\text{Cl}_3(\text{H}_2\text{O})_2]^2$  | 1.808                        | 2.913                         | 2.669                                      |
| $[\text{NpO}_2\text{Cl}_4]^{3-}$                     | 1.806                        | 2.845                         | -                                          |
| $[\text{NpO}_2\text{Cl}_4(\text{H}_2\text{O})]^{3-}$ | 1.803                        | 2.943                         | 2.683                                      |

**Table S21:** Selected bond lengths of molecular DFT optimized dimeric and trimeric structures in aqueous media

| Structure | Average Np=O bond | Average terminal Np-Cl | Average bridging Np-Cl | Average Np-OH <sub>2</sub> bond |
|-----------|-------------------|------------------------|------------------------|---------------------------------|
|-----------|-------------------|------------------------|------------------------|---------------------------------|

|                                                            | length (Å)    | bond length (Å) | bond length (Å) | length (Å) |
|------------------------------------------------------------|---------------|-----------------|-----------------|------------|
| $[(\text{NpO}_2)_2\text{Cl}_7]^{5-}$                       | 1.811*, 1.808 | 2.855*, 2.925   | 2.865*, 3.114   | -          |
| $[(\text{NpO}_2)_2\text{Cl}_8]^{6-}$                       | 1.805         | 2.943           | 3.998           | -          |
| $[(\text{NpO}_2)_2\text{Cl}_6(\text{H}_2\text{O})_2]^{4+}$ | 1.807         | 2.935           | 2.962           | 2.664      |
| $[(\text{NpO}_2)_3\text{Cl}_{10}]^{7-}$                    | 1.809*, 1.808 | 2.852*, 2.928   | 2.870*, 2.999   | -          |
| $[(\text{NpO}_2)_3\text{Cl}_8(\text{H}_2\text{O})_3]^{5-}$ | 1.805         | 2.914           | 2.948           | 2.655      |
|                                                            |               |                 |                 |            |

\*Np center with equatorial coordination number of 4

#### 4. Non-covalent interactions analysis

**Table S22:** The full list of hydrogen bonding interactions in the unit cell of Np-Gua

| Hydrogen atom | H acceptor | Interaction distance (Å) | Bond order | Hydrogen atom | H acceptor | Interaction distance (Å) | Bond order |
|---------------|------------|--------------------------|------------|---------------|------------|--------------------------|------------|
| 49 H          | 16 Cl      | 2.237                    | 0.114      | 71 H          | 20 O       | 2.314                    | 0.047      |
| 50 H          | 15 Cl      | 2.237                    | 0.114      | 72 H          | 19 O       | 2.314                    | 0.047      |
| 51 H          | 14 Cl      | 2.237                    | 0.114      | 73 H          | 6 Cl       | 2.614                    | 0.054      |
| 52 H          | 13 Cl      | 2.237                    | 0.114      | 73 H          | 14 Cl      | 2.744                    | 0.036      |
| 53 H          | 5 Cl       | 2.986                    | 0.025      | 74 H          | 5 Cl       | 2.6144                   | 0.054      |
| 53 H          | 13 Cl      | 2.335                    | 0.094      | 74 H          | 13 Cl      | 2.744                    | 0.036      |
| 54 H          | 6 Cl       | 2.986                    | 0.025      | 75 H          | 8 Cl       | 2.614                    | 0.054      |
| 54 H          | 14 Cl      | 2.335                    | 0.094      | 75 H          | 16 Cl      | 2.744                    | 0.036      |
| 55 H          | 7 Cl       | 2.986                    | 0.025      | 76 H          | 15 Cl      | 2.744                    | 0.036      |
| 55 H          | 15 Cl      | 2.335                    | 0.094      | 76 H          | 7 Cl       | 2.614                    | 0.054      |
| 56 H          | 16 Cl      | 2.33                     | 0.094      | 77 H          | 20 O       | 1.993                    | 0.092      |
| 56 H          | 8 Cl       | 2.986                    | 0.025      | 78 H          | 19 O       | 1.993                    | 0.092      |
| 57 H          | 6 Cl       | 2.420                    | 0.082      | 79 H          | 18 O       | 1.993                    | 0.092      |
| 57 H          | 23 O       | 2.474                    | 0.032      | 80 H          | 17 O       | 1.993                    | 0.092      |
| 58 H          | 5 Cl       | 2.420                    | 0.082      | 81 H          | 21 O       | 1.847                    | 0.136      |
| 58 H          | 24 O       | 2.474                    | 0.032      | 82 H          | 22 O       | 1.847                    | 0.136      |
| 59 H          | 8 Cl       | 2.420                    | 0.082      | 83 H          | 23 O       | 1.847                    | 0.136      |
| 59 H          | 21 O       | 2.474                    | 0.032      | 84 H          | 24 O       | 1.847                    | 0.136      |
| 60 H          | 7 Cl       | 2.42                     | 0.082      | 85 H          | 18 O       | 1.884                    | 0.123      |
| 60 H          | 22 O       | 2.474                    | 0.032      | 86 H          | 17 O       | 1.884                    | 0.123      |
| 61 H          | 16 Cl      | 2.329                    | 0.089      | 87 H          | 20 O       | 1.884                    | 0.123      |
| 62 H          | 15 Cl      | 2.329                    | 0.089      | 88 H          | 19 O       | 1.884                    | 0.123      |
| 63 H          | 14 Cl      | 2.329                    | 0.089      | 89 H          | 16 Cl      | 2.401                    | 0.076      |
| 64 H          | 13 Cl      | 2.329                    | 0.089      | 90 H          | 15 Cl      | 2.401                    | 0.076      |
| 65 H          | 12 Cl      | 2.678                    | 0.048      | 91 H          | 14 Cl      | 2.401                    | 0.076      |
| 66 H          | 11 Cl      | 2.678                    | 0.048      | 92 H          | 13 Cl      | 2.401                    | 0.076      |
| 67 H          | 10 Cl      | 2.678                    | 0.048      | 93 H          | 9 Cl       | 2.383                    | 0.090      |
| 68 H          | 9 Cl       | 2.678                    | 0.048      | 94 H          | 10 Cl      | 2.383                    | 0.090      |
| 69 H          | 18 O       | 2.314                    | 0.047      | 95 H          | 11 Cl      | 2.383                    | 0.090      |

70 H      17 O      2.314      0.047

96 H      12 Cl      2.3835      0.090

**Table S23:** The full list of cation interactions in the unit cell of Np-Rb

| Rb <sup>+</sup> atom | accepter | Interaction distance (Å) | Bond order | Rb <sup>+</sup> atom | accepter | Interaction distance (Å) | Bond order |
|----------------------|----------|--------------------------|------------|----------------------|----------|--------------------------|------------|
| 5 Rb                 | 16 Cl    | 3.318                    | 0.094      | 7 Rb                 | 9 Cl     | 3.294                    | 0.096      |
| 5 Rb                 | 17 O     | 2.992                    | 0.065      | 7 Rb                 | 12 Cl    | 3.318                    | 0.094      |
| 5 Rb                 | 22 O     | 3.126                    | 0.060      | 7 Rb                 | 20 O     | 3.126                    | 0.061      |
| 5 Rb                 | 24 O     | 3.126                    | 0.060      | 7 Rb                 | 10 Cl    | 3.318                    | 0.094      |
| 5 Rb                 | 13 Cl    | 3.294                    | 0.096      | 7 Rb                 | 11 Cl    | 3.294                    | 0.096      |
| 5 Rb                 | 14 Cl    | 3.318                    | 0.094      | 7 Rb                 | 18 O     | 3.126                    | 0.061      |
| 5 Rb                 | 15 Cl    | 3.294                    | 0.096      | 7 Rb                 | 21 O     | 2.992                    | 0.065      |
| 5 Rb                 | 19 O     | 2.992                    | 0.065      | 7 Rb                 | 23 O     | 2.992                    | 0.065      |
| 6 Rb                 | 15 Cl    | 3.318                    | 0.094      | 8 Rb                 | 12 Cl    | 3.294                    | 0.096      |
| 6 Rb                 | 18 O     | 2.992                    | 0.065      | 8 Rb                 | 17 O     | 3.126                    | 0.061      |
| 6 Rb                 | 21 O     | 3.126                    | 0.060      | 8 Rb                 | 22 O     | 2.992                    | 0.065      |
| 6 Rb                 | 23 O     | 3.126                    | 0.060      | 8 Rb                 | 9 Cl     | 3.318                    | 0.094      |
| 6 Rb                 | 13 Cl    | 3.318                    | 0.094      | 8 Rb                 | 10 Cl    | 3.294                    | 0.096      |
| 6 Rb                 | 14 Cl    | 3.294                    | 0.096      | 8 Rb                 | 11 Cl    | 3.318                    | 0.094      |
| 6 Rb                 | 16 Cl    | 3.294                    | 0.096      | 8 Rb                 | 19 O     | 3.126                    | 0.061      |
| 6 Rb                 | 20 O     | 2.992                    | 0.065      | 8 Rb                 | 24 O     | 2.992                    | 0.065      |

**Table S24:** The full list of hydrogen bonding interactions in the unit cell of Np-Rb

| Hydrogen atom | H accepter | Interaction distance (Å) | Bond order |
|---------------|------------|--------------------------|------------|
| 29 H          | 18 O       | 1.942                    | 0.109      |
| 30 H          | 17 O       | 1.942                    | 0.109      |
| 31 H          | 20 O       | 1.942                    | 0.109      |
| 32 H          | 19 O       | 1.942                    | 0.109      |
| 33 H          | 22 O       | 1.942                    | 0.109      |
| 34 H          | 21 O       | 1.942                    | 0.109      |
| 35 H          | 24 O       | 1.942                    | 0.109      |
| 36 H          | 23 O       | 1.942                    | 0.109      |

## 5. Vibrational analysis

### 4.1 Fitted Raman spectra

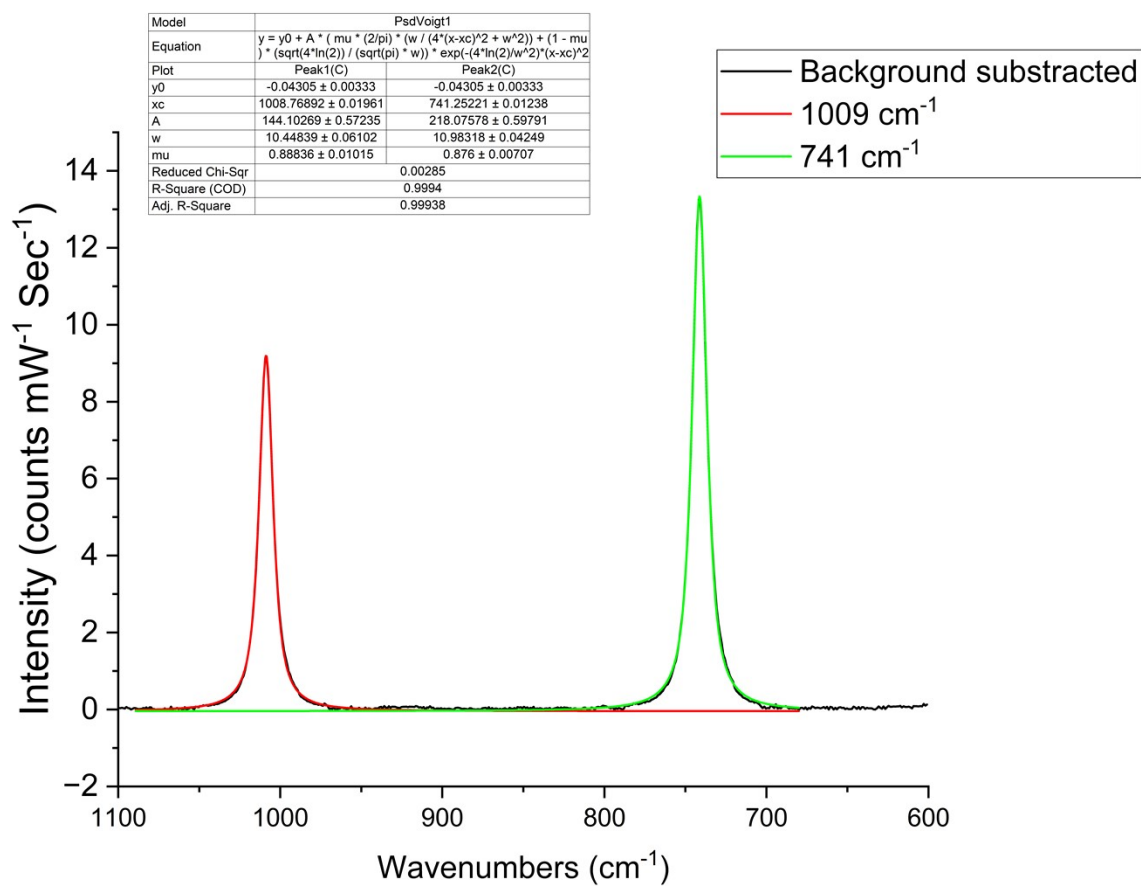

**Figure S3:** Fitted Raman spectrum of Np-Gua in the spectral window of 1100-600 cm<sup>-1</sup> with fitting parameters.



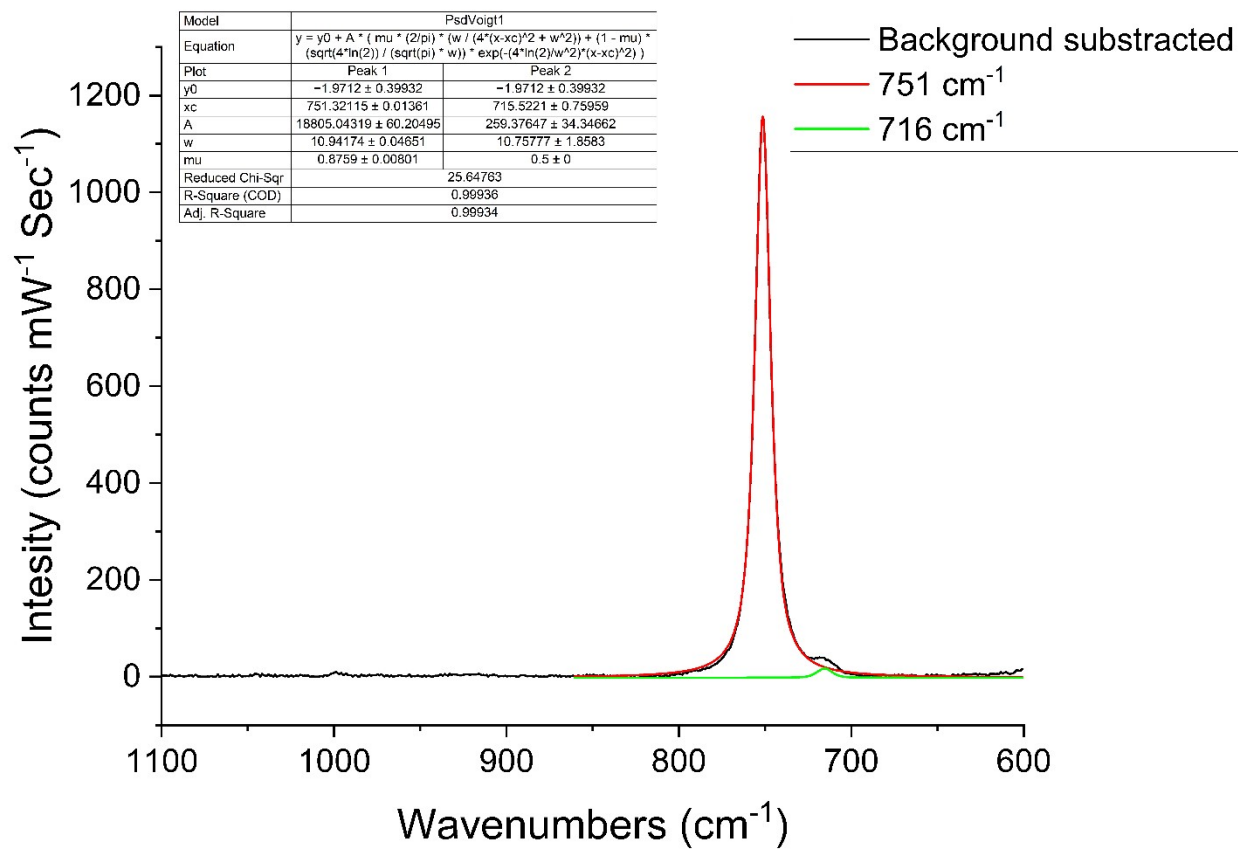

**Figure S4:** Fitted Raman spectrum of Np-Rb in the spectral window of 1100-600  $\text{cm}^{-1}$  with fitting parameters.

## 4.2 Calculated vibrational modes

**Table S25:** The calculated vibrational modes of  $[(\text{NpO}_2)_2\text{Cl}_8]^{6-}$ . Red font is used to identify the neptunyl symmetric and asymmetrical stretches.

| Mode # | Frequency (cm <sup>-1</sup> ) | Mode # | Frequency (cm <sup>-1</sup> ) | Mode # | Frequency (cm <sup>-1</sup> ) |
|--------|-------------------------------|--------|-------------------------------|--------|-------------------------------|
| 1      | 33.57                         | 13     | 115.07                        | 25     | 195.91                        |
| 2      | 35.58                         | 14     | 117.96                        | 26     | 201.39                        |
| 3      | 37.46                         | 15     | 120.4                         | 27     | 203.66                        |
| 4      | 51.83                         | 16     | 128.1                         | 28     | 207.94                        |
| 5      | 56.01                         | 17     | 134.17                        | 29     | 277.32                        |
| 6      | 74.16                         | 18     | 135.01                        | 30     | 281.06                        |
| 7      | 80.38                         | 19     | 148.12                        | 31     | 281.76                        |
| 8      | 84.81                         | 20     | 148.84                        | 32     | 284.26                        |
| 9      | 91.57                         | 21     | 161.19                        | 33     | 765.36                        |
| 10     | 94.52                         | 22     | 168.67                        | 34     | 770.38                        |
| 11     | 100.04                        | 23     | 187.28                        | 35     | 796                           |
| 12     | 109.19                        | 24     | 192.86                        | 36     | 798.19                        |

**Table S26:** The calculated vibrational modes of  $[(\text{NpO}_2)_2\text{Cl}_6(\text{H}_2\text{O})_2]^{4-}$ . Red font is used to identify the neptunyl symmetric and asymmetrical stretches.

| Mode # | Frequency (cm <sup>-1</sup> ) | Mode # | Frequency (cm <sup>-1</sup> ) | Mode # | Frequency (cm <sup>-1</sup> ) |
|--------|-------------------------------|--------|-------------------------------|--------|-------------------------------|
| 1      | 34.18                         | 17     | 157.04                        | 33     | 278.65                        |
| 2      | 35.61                         | 18     | 162.27                        | 34     | 296.28                        |
| 3      | 45.81                         | 19     | 169.84                        | 35     | 432.73                        |
| 4      | 50.74                         | 20     | 170.60                        | 36     | 436.52                        |
| 5      | 57.94                         | 21     | 173.50                        | 37     | 645.50                        |
| 6      | 59.72                         | 22     | 177.87                        | 38     | 646.35                        |
| 7      | 70.98                         | 23     | 180.88                        | 39     | 776.10                        |
| 8      | 76.77                         | 24     | 185.02                        | 40     | 780.55                        |
| 9      | 80.03                         | 25     | 190.60                        | 41     | 809.99                        |
| 10     | 88.48                         | 26     | 197.17                        | 42     | 812.26                        |
| 11     | 92.86                         | 27     | 232.06                        | 43     | 1550.34                       |
| 12     | 99.10                         | 28     | 233.05                        | 44     | 1553.25                       |
| 13     | 108.55                        | 29     | 252.15                        | 45     | 3528.15                       |
| 14     | 114.08                        | 30     | 256.89                        | 46     | 3545.21                       |
| 15     | 130.04                        | 31     | 260.59                        | 47     | 3822.44                       |
| 16     | 150.32                        | 32     | 270.80                        | 48     | 3823.60                       |

**Table S27:** The calculated vibrational modes of Guanidinium cation

| Mode # | Frequency (cm <sup>-1</sup> ) | Mode # | Frequency (cm <sup>-1</sup> ) | Mode # | Frequency (cm <sup>-1</sup> ) |
|--------|-------------------------------|--------|-------------------------------|--------|-------------------------------|
| 1      | 209.00                        | 9      | 728.95                        | 17     | 1677.21                       |
| 2      | 242.78                        | 10     | 1028.30                       | 18     | 1703.22                       |
| 3      | 259.05                        | 11     | 1047.37                       | 19     | 3591.13                       |
| 4      | 297.55                        | 12     | 1123.16                       | 20     | 3594.41                       |
| 5      | 519.09                        | 13     | 1131.33                       | 21     | 3607.02                       |
| 6      | 526.79                        | 14     | 1597.12                       | 22     | 3706.01                       |
| 7      | 576.37                        | 15     | 1598.03                       | 23     | 3708.70                       |
| 8      | 579.10                        | 16     | 1676.38                       | 24     | 3711.15                       |

## 6. Insight into chain formation

**Table S28:** Possible formation reactions that may be involved in the formation of **Np-Gua**.

| Step | Possible Reactions                                                                                                                                                                                                                                                                                   | $\Delta H$<br>(kJ/mol) |
|------|------------------------------------------------------------------------------------------------------------------------------------------------------------------------------------------------------------------------------------------------------------------------------------------------------|------------------------|
| 1    | <b>I</b> $2[\text{NpO}_2\text{Cl}_3(\text{H}_2\text{O})]^{2-}_{(\text{aq})} + \text{HCl}_{(\text{aq})} \rightarrow [(\text{NpO}_2)_2\text{Cl}_7]^{5-}_{(\text{aq})} + \text{H}_3\text{O}^+_{(\text{aq})} + \text{H}_2\text{O}_{(\text{aq})}$                                                         | -94.00                 |
|      | <b>II</b> $[\text{NpO}_2\text{Cl}_4(\text{H}_2\text{O})]^{3-}_{(\text{aq})} + [\text{NpO}_2\text{Cl}_3(\text{H}_2\text{O})]^{2-}_{(\text{aq})} \rightarrow [(\text{NpO}_2)_2\text{Cl}_7]^{5-}_{(\text{aq})} + 2\text{H}_2\text{O}_{(\text{aq})}$                                                     | -46.17                 |
|      | <b>III</b> $[\text{NpO}_2\text{Cl}_4]^{3-}_{(\text{aq})} + [\text{NpO}_2\text{Cl}_3(\text{H}_2\text{O})]^{2-}_{(\text{aq})} \rightarrow [(\text{NpO}_2)_2\text{Cl}_7]^{5-}_{(\text{aq})} + \text{H}_2\text{O}_{(\text{aq})}$                                                                         | -44.63                 |
|      | <b>IV</b> $2[\text{NpO}_2\text{Cl}_3(\text{H}_2\text{O})_2]^{2-}_{(\text{aq})} + \text{HCl}_{(\text{aq})} \rightarrow [(\text{NpO}_2)_2\text{Cl}_7]^{5-}_{(\text{aq})} + \text{H}_3\text{O}^+_{(\text{aq})} + 3\text{H}_2\text{O}_{(\text{aq})}$                                                     | -34.50                 |
|      | <b>V</b> $[\text{NpO}_2\text{Cl}_4(\text{H}_2\text{O})]^{3-}_{(\text{aq})} + [\text{NpO}_2\text{Cl}_3(\text{H}_2\text{O})_2]^{2-}_{(\text{aq})} \rightarrow [(\text{NpO}_2)_2\text{Cl}_7]^{5-}_{(\text{aq})} + 3\text{H}_2\text{O}_{(\text{aq})}$                                                    | -16.42                 |
|      | <b>VI</b> $[\text{NpO}_2\text{Cl}_4]^{3-}_{(\text{aq})} + [\text{NpO}_2\text{Cl}_3(\text{H}_2\text{O})_2]^{2-}_{(\text{aq})} \rightarrow [(\text{NpO}_2)_2\text{Cl}_7]^{5-}_{(\text{aq})} + 2\text{H}_2\text{O}_{(\text{aq})}$                                                                       | -14.88                 |
|      | <b>VII</b> $[\text{NpO}_2\text{Cl}_4]^{3-}_{(\text{aq})} + [\text{NpO}_2\text{Cl}_4(\text{H}_2\text{O})]^{3-}_{(\text{aq})} + \text{H}_3\text{O}^+_{(\text{aq})} \rightarrow [(\text{NpO}_2)_2\text{Cl}_7]^{5-}_{(\text{aq})} + \text{HCl}_{(\text{aq})} + 2\text{H}_2\text{O}_{(\text{aq})}$        | > 0                    |
|      | <b>VIII</b> $6[\text{NpO}_2\text{Cl}_4(\text{H}_2\text{O})]^{3-}_{(\text{aq})} + \text{H}_3\text{O}^+_{(\text{aq})} \rightarrow [(\text{NpO}_2)_2\text{Cl}_7]^{5-}_{(\text{aq})} + \text{HCl}_{(\text{aq})} + 3\text{H}_2\text{O}_{(\text{aq})}$                                                     | > 0                    |
|      | <b>IX</b> $[\text{NpO}_2\text{Cl}_4]^{3-}_{(\text{aq})} + [\text{NpO}_2\text{Cl}_4]^{3-}_{(\text{aq})} + \text{H}_3\text{O}^+_{(\text{aq})} \rightarrow [(\text{NpO}_2)_2\text{Cl}_7]^{5-}_{(\text{aq})} + \text{HCl}_{(\text{aq})} + \text{H}_2\text{O}_{(\text{aq})}$                              | > 0                    |
| 2    | <b>I</b> $[(\text{NpO}_2)_2\text{Cl}_7]^{5-}_{(\text{aq})} + [\text{NpO}_2\text{Cl}_3(\text{H}_2\text{O})]^{2-}_{(\text{aq})} \rightarrow [(\text{NpO}_2)_3\text{Cl}_{10}]^{7-}_{(\text{aq})} + \text{H}_2\text{O}_{(\text{aq})}$                                                                    | -23.47                 |
|      | <b>II</b> $[(\text{NpO}_2)_2\text{Cl}_7]^{5-}_{(\text{aq})} + [\text{NpO}_2\text{Cl}_3(\text{H}_2\text{O})_2]^{2-}_{(\text{aq})} \rightarrow [(\text{NpO}_2)_3\text{Cl}_{10}]^{7-}_{(\text{aq})} + 2\text{H}_2\text{O}_{(\text{aq})}$                                                                | > 0                    |
|      | <b>III</b> $[(\text{NpO}_2)_2\text{Cl}_7]^{5-}_{(\text{aq})} + [\text{NpO}_2\text{Cl}_4(\text{H}_2\text{O})]^{2-}_{(\text{aq})} + \text{H}_3\text{O}^+_{(\text{aq})} \rightarrow [(\text{NpO}_2)_3\text{Cl}_{10}]^{7-}_{(\text{aq})} + \text{HCl}_{(\text{aq})} + 2\text{H}_2\text{O}_{(\text{aq})}$ | > 0                    |
|      | <b>IV</b> $[(\text{NpO}_2)_2\text{Cl}_7]^{5-}_{(\text{aq})} + [\text{NpO}_2\text{Cl}_4]^{3-}_{(\text{aq})} + \text{H}_3\text{O}^+_{(\text{aq})} \rightarrow [(\text{NpO}_2)_3\text{Cl}_{10}]^{7-}_{(\text{aq})} + \text{HCl}_{(\text{aq})} + \text{H}_2\text{O}_{(\text{aq})}$                       | > 0                    |



---

**VI**

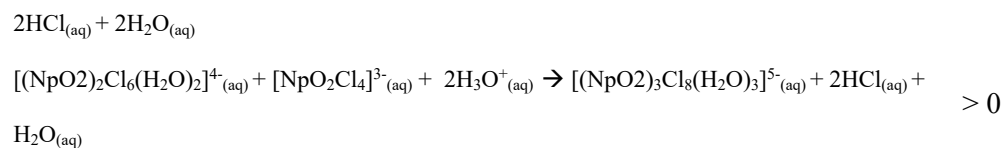

## 7. References

1. T. A. Manz and N. G. Limas, *RSC Advances*, 2016, **6**, 47771-47801.
2. N. G. Limas and T. A. Manz, *RSC Advances*, 2016, **6**, 45727-45747.
3. T. A. Manz, *RSC Advances*, 2017, **7**, 45552-45581.
4. N. G. Limas and T. A. Manz, *RSC Advances*, 2018, **8**, 2678-2707.
